# Supplementary material for: Parenting practices during early childhood: validity evidence of a Brazilian scale
Source: PubMed Central journal article supplement — J Pediatr (Rio J). 2022 May 20;98(6):641–7. doi: 10.1016/j.jped.2022.01.007 (PMC9617280; doi:10.1016/j.jped.2022.01.007), 2022-05-20
Supplement: mmc1.pdf [file mmc1.pdf]

## JPED-D-21-00344 – Supplementary Material

### Appendix 1 - Supplementary Material.

#### Inventário de Práticas Parentais de Mães de Bebês (IPPMB) versão reduzida

Identificação:

Nome: \_\_\_\_\_ Idade \_\_\_\_\_

Escolaridade: \_\_\_\_\_

Nome do filho(a): \_\_\_\_\_ Idade: \_\_\_\_\_

*O objetivo deste instrumento é avaliar a maneira utilizada pelos pais na educação de seus filhos. Responda cada questão com sinceridade e tranquilidade. Suas informações serão sigilosas. Para cada questão assinale a coluna que indica a frequência com que esse evento ocorreu, assinalando:*

Nunca ou quase nunca (de 0 a 2 vezes em cada 10 eventos); Às vezes (de 3 a 7 vezes em cada 10 eventos); Sempre (de 8 a 10 vezes em cada 10 eventos)

| Itens da Escala IEPMB – Versão Curta                                                                         | Nunca ou quase nunca | Às vezes | Sempre |
|--------------------------------------------------------------------------------------------------------------|----------------------|----------|--------|
| 1 - Procuo saber como meu filho está durante a minha ausência                                                |                      |          |        |
| 2 - Se meu filho chora, digo que não vou pega-lo, mas se ele insiste em chorar, acabo pegando.               |                      |          |        |
| 3 - Trato mal meu filho(a) quando estou nervosa(o), e assim que passa a raiva me arrependo.                  |                      |          |        |
| 4 -Bato com a mão ou com outros objetos no meu filho(a)                                                      |                      |          |        |
| 5 - Não faço horários para meu filho, as coisas acontecem naturalmente.                                      |                      |          |        |
| 6 - Mesmo quando estou ocupado(a) ou viajando, telefono para saber como meu filho(a) está.                   |                      |          |        |
| 7 - Quando estou nervoso, acabo descontando em meu filho(a)                                                  |                      |          |        |
| 8 - Após ficar distante do meu filho quero saber como ele ficou (se chorou, se ficou bem, etc)               |                      |          |        |
| 9 - Sou mal-humorado(a) com meu filho(a).                                                                    |                      |          |        |
| 10 - Aviso que não vou pegar meu filho no colo quando ele faz birra, mas na hora “H” fico com pena e o pego. |                      |          |        |
| 11- Sou agressivo(a) com meu filho(a).                                                                       |                      |          |        |

#### Pontuando o IEPMB

(Essa informação é apenas para a pessoa que irá cotar o instrumento e não deverá ser inserida no questionário aplicado com as famílias)

Os 10 itens do IEPMB são compostos de 3 fatores. Nunca é pontuado como 0, às vezes como 1 e sempre como 2.

**Fator 1** - Agressividade e Desregulação Emocional: inclui os itens: 3,4,7,9 11. Pontuação de 0 a 10.

Quanto maior o escore piores as práticas parentais nesse fator. Ponto de corte:  $\geq 1$

**Fator 2** - Disciplina Relaxada: inclui os itens 2, 5 e 9. Pontuação de 0 a 6. Quanto maior o escore piores as práticas parentais nesse fator. Ponto de corte:  $\geq 4$

**Fator 3** - Monitoria Positiva: inclui os itens 1, 6 e 8. Pontuação de 0 a 6. Quanto maior o escore piores as práticas parentais nesse fator. Ponto de corte  $\leq 5$

#### Critérios de avaliação

Pais com práticas positivas: Fator 3  $> 5$ ; Fator 2  $< 4$ ; Fator 1  $< 1$ .

Pais com necessidade de orientação: Fator 3  $\leq 5$ ; Fator 2  $\geq 4$  ou Fator 1  $\geq 1$

Pais com necessidade de intervenção, como programas de parentalidade: Fator 3  $\leq$  5; Fator 2  $\geq$  4 e Fator 1  $\geq$  1

**Permissão para o uso do instrumento**

Não há necessidade de solicitar permissão para o uso do instrumento. No entanto, é exigido que o devido crédito seja concedido aos seus autores. O presente artigo deve ser utilizado para a citação do instrumento. Esta nota assegura a permissão para sua utilização.

**Parenting Practices Inventory for Mothers of Babies (IPPMB) short version**

Identification:

Name: \_\_\_\_\_ Age: \_\_\_\_\_

Scholarity: \_\_\_\_\_

Child's name: \_\_\_\_\_ Age: \_\_\_\_\_

The objective of this instrument is to assess the way used by parents in educating their children. Answer each question honestly and calmly. Your information will be confidential. For each question, mark the column that indicates how often this event occurred:

Never or almost never (0-2 times in 10 events); Sometimes (3 to 7 times in 10 events); Always (from 8 to 10 times in 10 events)

| Items of IEPMB Scale Short Version                                                                                                   | Never or almost never | Sometimes | Always |
|--------------------------------------------------------------------------------------------------------------------------------------|-----------------------|-----------|--------|
| 1 - I demand to know how my child was in my absence                                                                                  |                       |           |        |
| 2 - If my child cries, I say that I will not catch him or her, but if he or she insists on crying, I catch him or her.               |                       |           |        |
| 3 - I mistreat my son or daughter when I'm nervous and when the anger passes I regret it.                                            |                       |           |        |
| 4 - I hit my child with my hand or with some objects.                                                                                |                       |           |        |
| 5 - I don't make time for my child, things happen naturally.                                                                         |                       |           |        |
| 6 - Even when I'm busy or traveling, I phone to find out how my child is.                                                            |                       |           |        |
| 7 - When I'm nervous, I end up taking it out on my son or daughter                                                                   |                       |           |        |
| 8 - After staying away from my child I ask the caregiver how he or she behaved (example: if he or she cried; if he or she was fine). |                       |           |        |
| 9 - I'm bad-tempered with my child.                                                                                                  |                       |           |        |
| 10 - I notice that I will not put my child in my arms when he or she throws a tantrum, but then I get pity and end up doing it.      |                       |           |        |
| 11 - I am aggressive with my child.                                                                                                  |                       |           |        |

**Scoring the IEPMB**

(This information is only for the person who will quote the instrument and should not be included in the questionnaire applied with the families)

The 10 items of the IEPMB are composed of 3 factors. Never is scored as 0 points, sometimes as 1 point, and always as 2 points.

**Factor 1 - Aggressiveness and Emotional Dysregulation:** includes items: 3, 4,7,9 and 11. Score from 0 to 10. The higher the score, the worse the parenting practices in this factor. Cutoff point  $\geq$  1

**Factor 2 - Relaxed Discipline:** includes items 2, 5 and 10. Score from 0 to 6. The higher the score, the worse the parenting practices in this factor. Cutoff point:  $\geq$  4

**Factor 3 - Positive Monitoring:** includes items 1, 6 and 8. Score from 0 to 6. The higher the score, the better the practices related to this factor. Cutoff point:  $\leq$  5

**Evaluation criteria**

Parents with positive practices: Factor 3  $>$  5; Factor 2  $<$  4; Factor 1  $<$  1.

Parents needing guidance: Factor 3  $\leq$  5; Factor 2  $\geq$  4 or Factor 1  $\geq$  1

Parents needing intervention, such as parenting programs: Factor 3  $\leq$  5; Factor 2  $\geq$  4 and Factor 1  $\geq$  1

**Permission to use the instrument**

There is no need to request permission to use the instrument. However, due credit is required to be given to the authors. This article must be used for the citation of the IEPMB instrument. This note assures permission for its use.
